# Supplementary material
Source: publisher figshare collection journal article supplement (https://gsapubs.figshare.com/ndownloader/files/23300507)
Supplement: Supplementary file 1 [file 23300507]

Data Repository Material: Centennial-scale East Asian summer monsoon intensity based on  $\delta^{18}\text{O}$  values in ostracode shells and its relationship to land-ocean air temperature gradients over the last 1700 years

**Additional figures :** Figures DR1, DR2, DR3, DR4, DR5 and DR6

**Additional tables :** Tables DR1, DR2, DR3 and DR4

**Discussions on a long-term trend in  $\delta^{18}\text{O}_{\text{ostracode}}$  values**

**References**

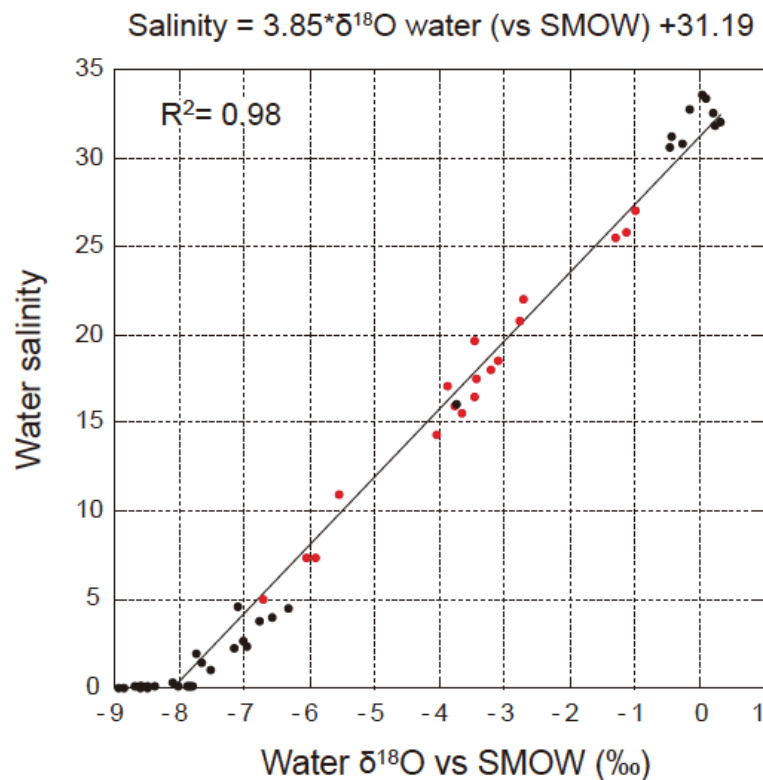

**Figure DR1.** Plot of surface water  $\delta^{18}\text{O}$  values and salinity from Lake Nakaumi, Lake Shinji, a river connecting to Lake Shinji and the Sea of Japan. The red circles represent data from Lake Nakaumi.

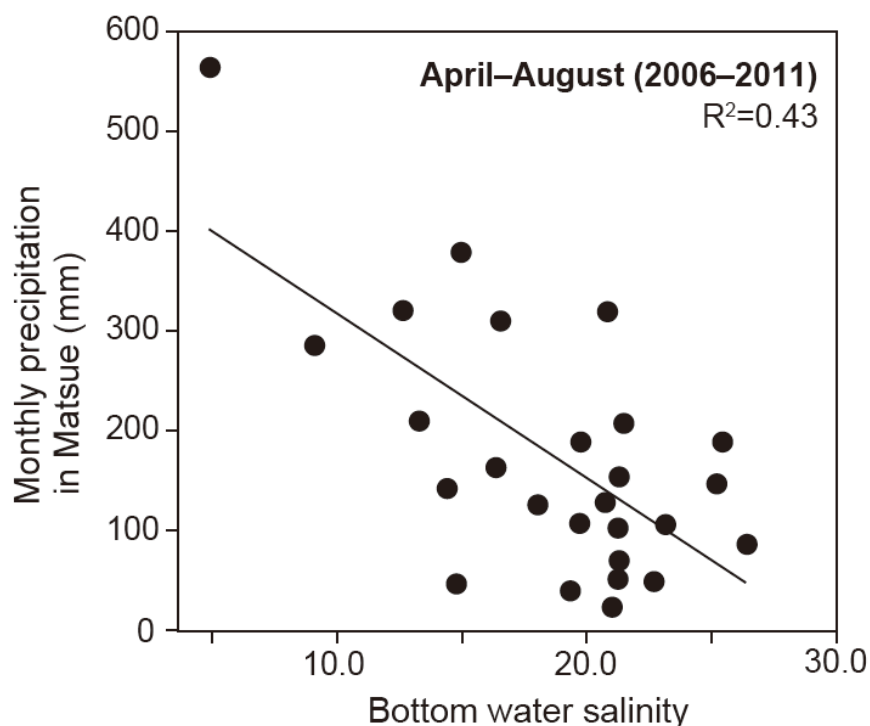

**Figure DR2.** Plot of summer monthly precipitation (mm) in the city of Matsue and bottom-water salinity in Lake Nakaumi. The precipitation data were obtained from the Japan Meteorological Agency website ([http://www.data.jma.go.jp/obd/stats/etrn/view/monthly\\_s3.php?prec\\_no=68&block\\_no=47741&year=&month=&day=&elm=monthly&view=a13](http://www.data.jma.go.jp/obd/stats/etrn/view/monthly_s3.php?prec_no=68&block_no=47741&year=&month=&day=&elm=monthly&view=a13)). Salinity was measured monthly in the central portion of Lake Nakaumi between April and August 2006–2011. The salinity measurement accuracy is 0.01.

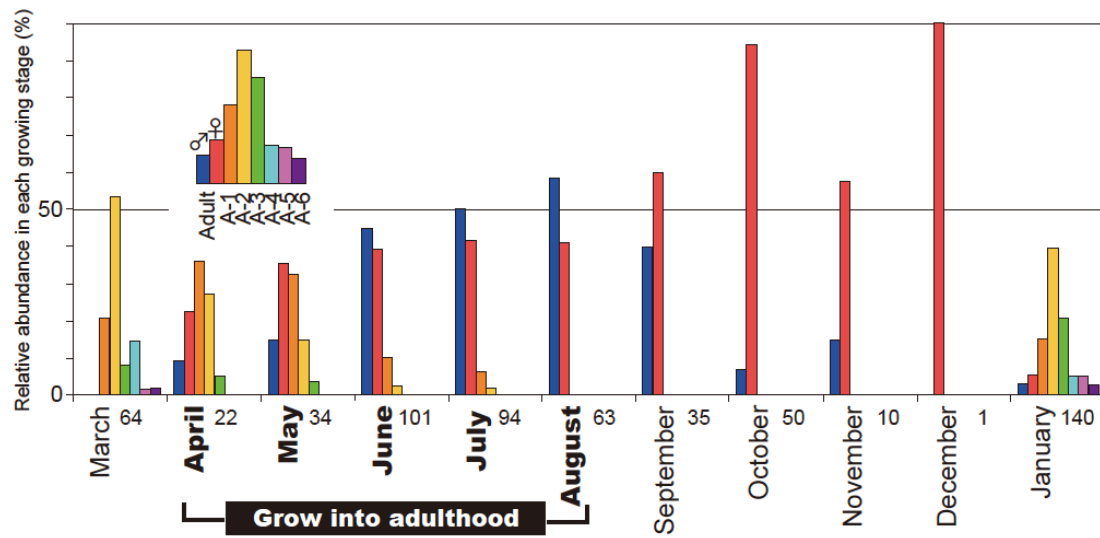

**Figure DR3.** *Bicornucythere bisanensis* population dynamics in Lake Nakaumi. A-1 indicates juveniles that reached adulthood after molting. All *B. bisanensis* carapaces with soft parts were collected from dredged bottom-surface sediments sampled monthly from the eastern portion of Nakaumi (35°29' 47" N, 133°12' 00" E) between March 2005 and January 2006. The numbers to the right of the month indicate the collected ostracode individuals. Adult specimens were not observed in March, and the variations in the adult specimen population throughout the year suggest that individuals grow into adulthood between April and August. This interval is consistent with the *B. bisanensis* population dynamics in Aburatsubo Cove, Japan (Abe, 1983).

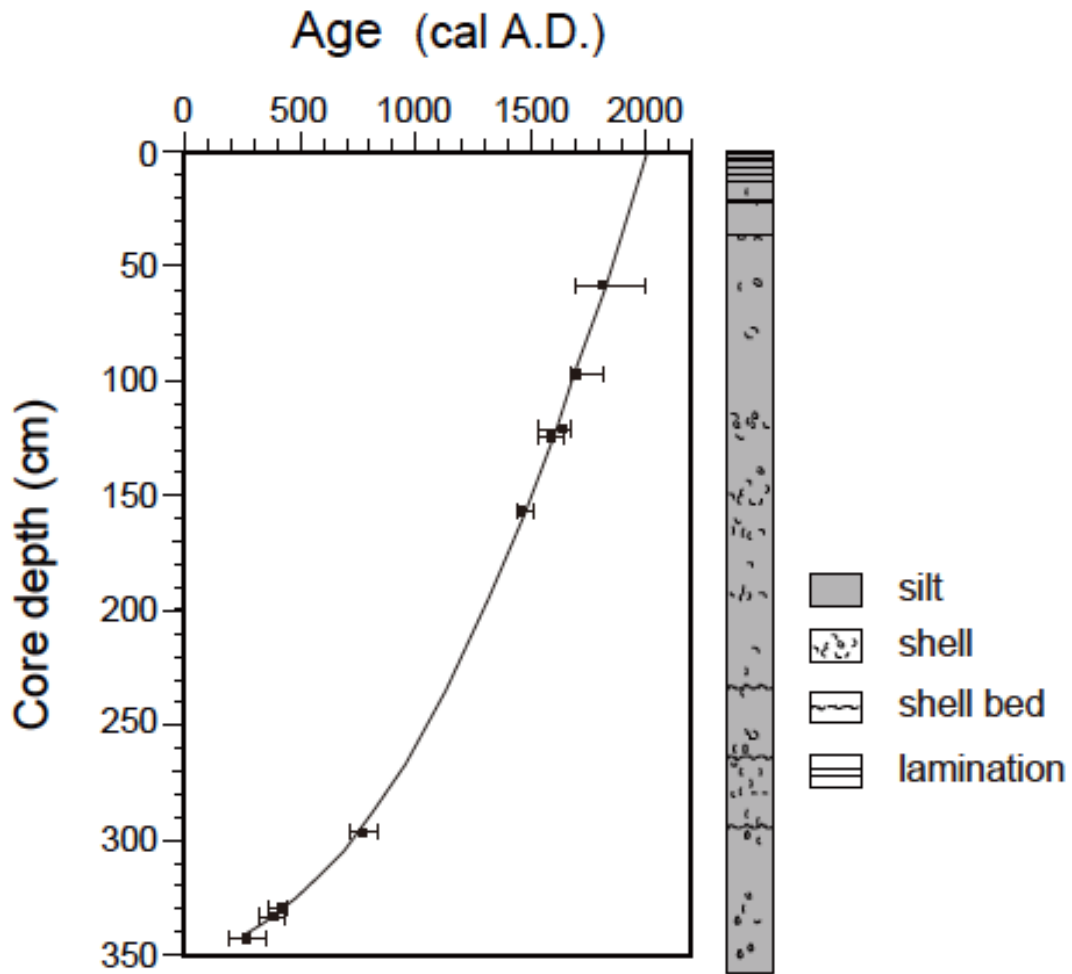

**Figure DR4.** Age model updated with seven additional  $^{14}\text{C}$  data and a columnar section of the X core collected from the central portion of Lake Nakaumi. The regional reservoir age around the study area was calculated to be -27 years (close to 0) based on the mean of eight regional marine reservoir ages (between 345 and -128 years) in the Sea of Japan (Yoneda et al., 2000; Kuzmin et al., 2001; Kong and Lee, 2005). Thus, the 400-year average marine reservoir age was subtracted from each  $^{14}\text{C}$  age.

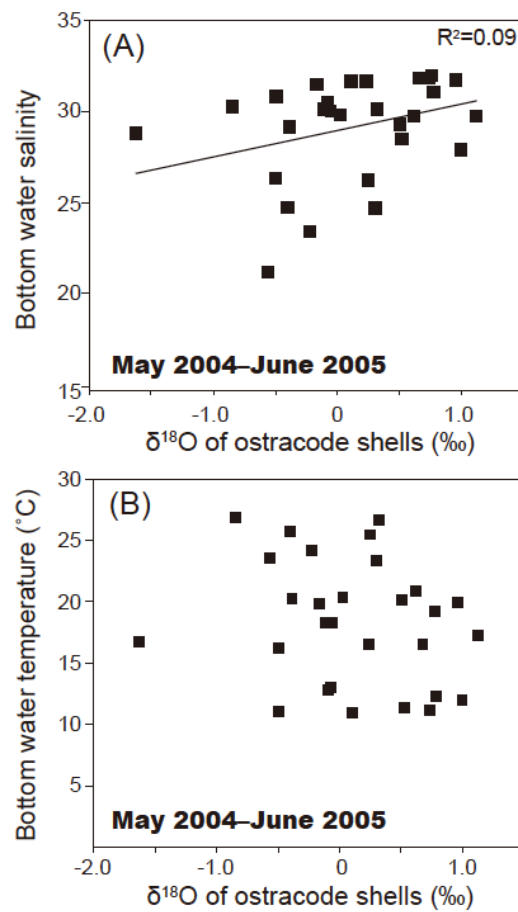

**Figure DR5.** Plots of  $\delta^{18}\text{O}_{\text{ostracode}}$  values vs. bottom-water salinity (A) and bottom-water temperature (B) in Lake Nakaumi for May 2004 and June 2005.

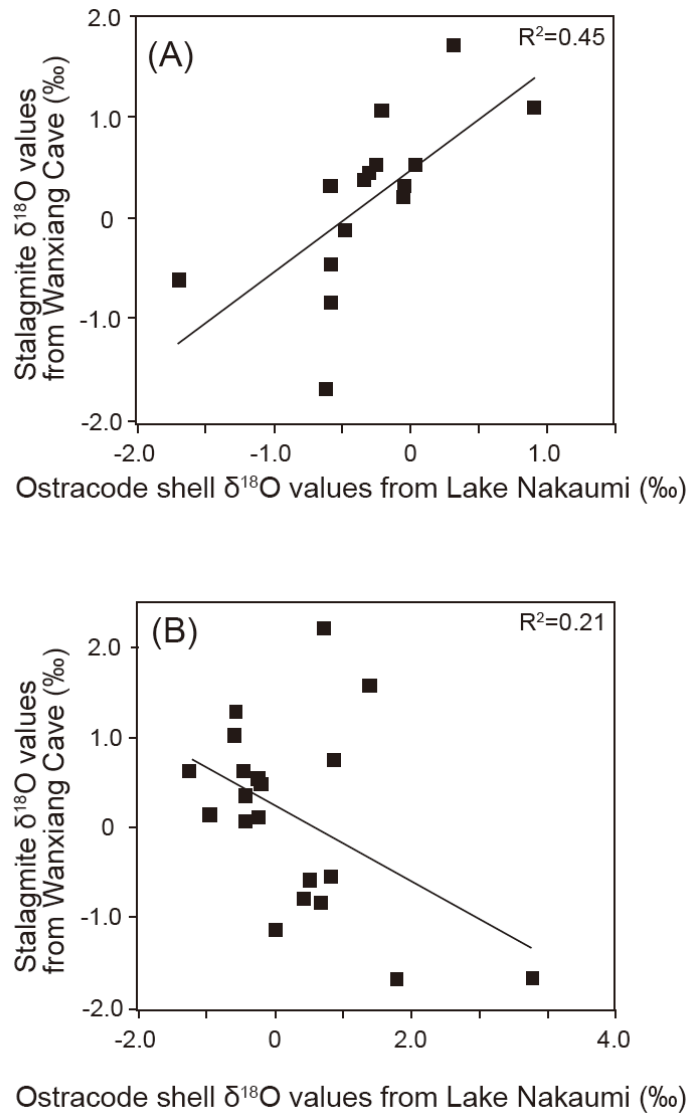

**Figure DR6.** Plots of 50-yr moving averages for ostracode shell  $\delta^{18}\text{O}$  values from Lake Nakaumi vs. stalagmite  $\delta^{18}\text{O}$  values from Wanxiang Cave between 1100 and 1700 AD (A), 300 and 1100 AD and since 1700 AD (B).

**Table DR1.** Ostracode *Bicornucythere bisanensis* occurrences from March 2005 to January 2006 in Lake Nakaumi.

| Age                       | Date | March 11, 2005 | April 11, 2005 | May 12, 2005 | June 10, 2005 | July 14, 2005 | August 8, 2005 | September 9, 2005 | October 13, 2005 | November 10, 2005 | December 20, 2005 | January 16, 2006 |
|---------------------------|------|----------------|----------------|--------------|---------------|---------------|----------------|-------------------|------------------|-------------------|-------------------|------------------|
| Male (Adult)              |      |                | 2              | 5            | 47            | 47            | 37             | 14                | 3                | 2                 |                   | 5                |
| Female (Adult)            |      |                | 5              | 12           | 40            | 39            | 26             | 21                | 47               | 8                 | 1                 | 9                |
| A-1                       |      | 14             | 8              | 11           | 11            | 6             |                |                   |                  |                   |                   | 22               |
| A-2                       |      | 34             | 6              | 5            | 3             | 2             |                |                   |                  |                   |                   | 55               |
| A-3                       |      | 5              | 1              | 1            |               |               |                |                   |                  |                   |                   | 29               |
| A-4                       |      | 9              |                |              |               |               |                |                   |                  |                   |                   | 8                |
| A-5                       |      | 1              |                |              |               |               |                |                   |                  |                   |                   | 8                |
| A-6                       |      | 1              |                |              |               |               |                |                   |                  |                   |                   | 4                |
| Total number of specimens |      | 64             | 22             | 34           | 101           | 94            | 63             | 35                | 50               | 10                | 1                 | 140              |

**Table DR2.** AMS  $^{14}\text{C}$  data from the X core. The two samples marked with an asterisk at the end of the sample number are from Yamada et al. (2015).

| Sample No. | Labo ID     | Core depth (cm) | Materials | measured radiocarbon age (y BP) | $\delta^{13}\text{C}$ (‰) | Conventional radiocarbon age (y BP) | Calibrated age (2 $\sigma$ ) (Cal AD) |
|------------|-------------|-----------------|-----------|---------------------------------|---------------------------|-------------------------------------|---------------------------------------|
| X-058B     | Beta-386123 | 58              | shell     | 140 $\pm$ 30                    | -2.0                      | 520 $\pm$ 30                        | 1815 (1700–1895 and 1940–post 1950)   |
| X-097B     | Beta-386124 | 97              | shell     | 190 $\pm$ 30                    | -1.9                      | 570 $\pm$ 30                        | 1705 (1675–1820)                      |
| X-121B     | Beta-386125 | 121             | shell     | 300 $\pm$ 30                    | -1.4                      | 690 $\pm$ 30                        | 1640 (1535–1675)                      |
| X-M-24*    | Beta-189760 | 124             | shell     | 330 $\pm$ 40                    | -1.0                      | 720 $\pm$ 40                        | 1590 (1530–1650)                      |
| X-157B     | Beta-386126 | 157             | shell     | 480 $\pm$ 30                    | -2.2                      | 850 $\pm$ 30                        | 1465 (1440–1505)                      |
| X-296B     | Beta-386127 | 296             | shell     | 1310 $\pm$ 30                   | -6.9                      | 1610 $\pm$ 30                       | 775 (705–835)                         |
| X-M-56*    | Beta-184671 | 330             | shell     | 1610 $\pm$ 40                   | -1.7                      | 1990 $\pm$ 40                       | 420 (360–440)                         |
| X-333B     | Beta-386128 | 333             | shell     | 1640 $\pm$ 30                   | -2.5                      | 2010 $\pm$ 30                       | 390 (320–435)                         |
| X-343B     | Beta-386129 | 343             | shell     | 1710 $\pm$ 30                   | -1.4                      | 2100 $\pm$ 30                       | 265 (195–350)                         |

\* after Yamada et al. (2015)

**Table DR3.** Ostracode *Bicornucythere bisanensis* shell  $\delta^{13}\text{C}$  and  $\delta^{18}\text{O}$  values from the X core. The term “av” to the right of the sample number indicates that the  $\delta^{13}\text{C}$  and  $\delta^{18}\text{O}$  values were averaged among several measurements. The salinity was calculated based on the equation that describes the relationship between bottom-water salinity and *B. bisanensis*  $\delta^{18}\text{O}$  values in Figure DR5.

| Median<br>core depth<br>(cm) | Age (cal.<br>AD) | Sample No. | No. of<br>individuals | $\delta^{13}\text{C}$<br>VPDB<br>(‰) | $\delta^{18}\text{O}$<br>VPDB<br>(‰) | Calculated<br>salinity | Median<br>core depth<br>(cm) | Age (cal.<br>AD) | Sample No. | No. of<br>individuals | $\delta^{13}\text{C}$<br>VPDB<br>(‰) | $\delta^{18}\text{O}$<br>VPDB<br>(‰) | Calculated<br>salinity |
|------------------------------|------------------|------------|-----------------------|--------------------------------------|--------------------------------------|------------------------|------------------------------|------------------|------------|-----------------------|--------------------------------------|--------------------------------------|------------------------|
| 0.5                          | 1971             | X-01B      | 1                     | -4.93                                | -1.48                                | 26.8                   | 188.5                        | 1325             | X-189B av  | 6                     | -5.88                                | -1.29                                | 27.1                   |
| 10.5                         | 1953             | X-11B      | 1                     | -5.51                                | -0.87                                | 27.8                   | 193.5                        | 1299             | X-194B av  | 6                     | -5.07                                | -0.84                                | 27.8                   |
| 13.5                         | 1947             | X-14B av   | 4                     | -4.70                                | -0.98                                | 27.6                   | 199.5                        | 1268             | X-200B     | 1                     | -6.14                                | -1.68                                | 26.5                   |
| 17.5                         | 1938             | X-18B      | 1                     | -5.56                                | -0.76                                | 27.9                   | 209.5                        | 1214             | X-210B     | 1                     | -4.66                                | -2.03                                | 26.0                   |
| 18.5                         | 1936             | X-19B av   | 6                     | -4.91                                | -0.17                                | 28.9                   | 213.5                        | 1192             | X-214B     | 1                     | -5.51                                | -0.93                                | 27.7                   |
| 19.5                         | 1934             | X-20B av   | 5                     | -4.97                                | -0.90                                | 27.7                   | 214.5                        | 1187             | X-215B     | 1                     | -5.53                                | -1.08                                | 27.5                   |
| 20.5                         | 1932             | X-21B      | 1                     | -6.08                                | -1.15                                | 27.3                   | 216.5                        | 1176             | X-217B av  | 7                     | -4.63                                | -0.93                                | 27.7                   |
| 22.5                         | 1928             | X-23B av   | 5                     | -4.87                                | -0.92                                | 27.7                   | 219.5                        | 1159             | X-220B av  | 6                     | -5.58                                | -1.01                                | 27.6                   |
| 27.5                         | 1917             | X-28B      | 1                     | -5.57                                | -1.67                                | 26.5                   | 223.5                        | 1136             | X-224B av  | 5                     | -6.00                                | -0.96                                | 27.6                   |
| 28.5                         | 1914             | X-29B      | 1                     | -5.06                                | -0.99                                | 27.6                   | 227.5                        | 1113             | X-228B av  | 6                     | -5.46                                | -1.12                                | 27.4                   |
| 35.5                         | 1898             | X-36B      | 2                     | -6.11                                | -1.47                                | 26.8                   | 229.5                        | 1101             | X-230B     | 4                     | -5.46                                | -0.91                                | 27.7                   |
| 39.5                         | 1888             | X-40B      | 4                     | -5.55                                | -1.07                                | 27.5                   | 233.5                        | 1078             | X-234B av  | 7                     | -5.19                                | -0.60                                | 28.2                   |
| 41.5                         | 1883             | X-42B      | 2                     | -6.02                                | -0.16                                | 28.9                   | 238.5                        | 1048             | X-239B     | 1                     | -4.83                                | -1.32                                | 27.1                   |
| 43.5                         | 1878             | X-44B      | 1                     | -5.82                                | -0.56                                | 28.3                   | 239.5                        | 1042             | X-240B     | 8                     | -5.33                                | -0.59                                | 28.2                   |
| 46.5                         | 1871             | X-47B av   | 4                     | -5.88                                | -2.94                                | 24.5                   | 243.5                        | 1018             | X-244B av  | 3                     | -4.64                                | -0.75                                | 28.0                   |
| 51.5                         | 1857             | X-52B av   | 3                     | -5.60                                | -1.13                                | 27.4                   | 249.5                        | 982              | X-250B av  | 4                     | -4.82                                | 0.21                                 | 29.5                   |
| 53.5                         | 1852             | X-54B      | 1                     | -5.44                                | 0.01                                 | 29.2                   | 253.5                        | 957              | X-254B     | 1                     | -5.03                                | 0.56                                 | 30.0                   |
| 56.5                         | 1844             | X-57B av   | 4                     | -5.70                                | -1.45                                | 26.9                   | 256.5                        | 938              | X-257B av  | 8                     | -5.82                                | -0.28                                | 28.7                   |
| 59.5                         | 1835             | X-60B av   | 5                     | -5.20                                | -1.12                                | 27.4                   | 258.5                        | 926              | X-259B av  | 5                     | -5.41                                | -0.21                                | 28.8                   |
| 61.5                         | 1830             | X-62B      | 4                     | -5.38                                | -0.88                                | 27.8                   | 261.5                        | 906              | X-262B av  | 8                     | -5.46                                | -0.56                                | 28.3                   |
| 64.5                         | 1821             | X-65B      | 1                     | -4.56                                | -2.01                                | 26.0                   | 263.5                        | 894              | X-264B av  | 6                     | -5.49                                | -0.71                                | 28.0                   |
| 68.5                         | 1809             | X-69B av   | 5                     | -5.57                                | -1.24                                | 27.2                   | 266.5                        | 874              | X-267B av  | 6                     | -4.86                                | -0.32                                | 28.6                   |
| 73.5                         | 1794             | X-74B      | 2                     | -4.33                                | -1.15                                | 27.3                   | 268.5                        | 861              | X-269B av  | 7                     | -5.49                                | -0.33                                | 28.6                   |
| 76.5                         | 1785             | X-77B      | 4                     | -5.94                                | -2.03                                | 26.0                   | 269.5                        | 855              | X-270B av  | 5                     | -5.89                                | -0.60                                | 28.2                   |
| 78.5                         | 1779             | X-79B av   | 4                     | -4.86                                | -1.25                                | 27.2                   | 271.5                        | 842              | X-272B     | 8                     | -5.07                                | 0.03                                 | 29.2                   |
| 81.5                         | 1769             | X-82B      | 4                     | -6.21                                | -1.33                                | 27.1                   | 273.5                        | 829              | X-274B     | 1                     | -5.80                                | -1.02                                | 27.6                   |
| 84.5                         | 1759             | X-85B av   | 6                     | -4.94                                | -1.09                                | 27.4                   | 274.5                        | 822              | X-275B     | 3                     | -5.58                                | -0.57                                | 28.2                   |
| 88.5                         | 1746             | X-89B av   | 5                     | -4.67                                | -1.04                                | 27.5                   | 276.5                        | 809              | X-277B     | 8                     | -4.96                                | -0.87                                | 27.8                   |
| 93.5                         | 1729             | X-94B      | 1                     | -4.30                                | -1.22                                | 27.2                   | 278.5                        | 796              | X-279B     | 2                     | -4.13                                | -1.63                                | 26.6                   |
| 98.5                         | 1712             | X-99B av   | 6                     | -5.65                                | -0.91                                | 27.7                   | 279.5                        | 789              | X-280B av  | 6                     | -5.36                                | -0.23                                | 28.8                   |
| 104.5                        | 1691             | X-105B     | 7                     | -6.51                                | -1.65                                | 26.6                   | 281.5                        | 775              | X-282B     | 7                     | -5.29                                | -0.56                                | 28.3                   |
| 108.5                        | 1676             | X-109B     | 2                     | -5.14                                | -1.41                                | 26.9                   | 283.5                        | 762              | X-284B av  | 4                     | -6.04                                | -0.91                                | 27.7                   |
| 111.5                        | 1665             | X-112B av  | 9                     | -4.97                                | -1.44                                | 26.9                   | 286.5                        | 742              | X-287B av  | 7                     | -4.87                                | -0.27                                | 28.7                   |
| 113.5                        | 1657             | X-114B av  | 6                     | -5.58                                | -0.86                                | 27.8                   | 288.5                        | 728              | X-289B av  | 6                     | -5.39                                | -0.45                                | 28.4                   |
| 116.5                        | 1646             | X-117B av  | 6                     | -5.07                                | -1.28                                | 27.1                   | 291.5                        | 707              | X-292B     | 8                     | -5.54                                | -0.58                                | 28.2                   |
| 118.5                        | 1638             | X-119B av  | 5                     | -5.11                                | -1.13                                | 27.4                   | 293.5                        | 693              | X-294B     | 1                     | -4.10                                | -1.35                                | 27.0                   |
| 121.5                        | 1627             | X-122B     | 8                     | -5.63                                | -1.20                                | 27.3                   | 294.5                        | 686              | X-295B av  | 6                     | -4.47                                | -0.43                                | 28.5                   |
| 123.5                        | 1619             | X-124B av  | 5                     | -5.72                                | -1.01                                | 27.6                   | 296.5                        | 672              | X-297B     | 7                     | -4.84                                | -0.52                                | 28.3                   |
| 126.5                        | 1607             | X-127B     | 7                     | -6.33                                | -1.06                                | 27.5                   | 299.5                        | 651              | X-300B av  | 4                     | -5.68                                | -0.88                                | 27.8                   |
| 128.5                        | 1599             | X-129B av  | 6                     | -4.99                                | -1.28                                | 27.1                   | 303.5                        | 623              | X-304B av  | 6                     | -4.70                                | -0.31                                | 28.7                   |
| 131.5                        | 1587             | X-132B     | 7                     | -6.09                                | -1.54                                | 26.7                   | 306.5                        | 602              | X-307B     | 6                     | -4.57                                | -0.33                                | 28.6                   |
| 133.5                        | 1578             | X-134B av  | 6                     | -5.54                                | -1.13                                | 27.4                   | 308.5                        | 587              | X-309B av  | 7                     | -5.32                                | -0.28                                | 28.7                   |
| 137.5                        | 1562             | X-138B av  | 6                     | -5.33                                | -1.45                                | 26.9                   | 311.5                        | 566              | X-312B     | 8                     | -4.91                                | 0.39                                 | 29.7                   |
| 141.5                        | 1545             | X-142B     | 8                     | -6.03                                | -1.45                                | 26.9                   | 313.5                        | 551              | X-314B av  | 8                     | -5.20                                | -0.01                                | 29.1                   |
| 143.5                        | 1536             | X-144B av  | 6                     | -5.28                                | -1.59                                | 26.6                   | 315.5                        | 536              | X-316B     | 8                     | -5.32                                | -0.37                                | 28.6                   |
| 146.5                        | 1523             | X-147B     | 3                     | -5.78                                | -1.86                                | 26.2                   | 318.5                        | 514              | X-319B av  | 6                     | -5.47                                | -0.27                                | 28.7                   |
| 148.5                        | 1515             | X-149B av  | 7                     | -5.39                                | -1.03                                | 27.5                   | 323.5                        | 477              | X-324B av  | 8                     | -5.74                                | -0.41                                | 28.5                   |
| 151.5                        | 1501             | X-152B     | 8                     | -5.05                                | -0.02                                | 29.1                   | 326.5                        | 455              | X-327B     | 8                     | -4.94                                | -0.41                                | 28.5                   |
| 153.5                        | 1492             | X-154B av  | 8                     | -5.99                                | -1.39                                | 27.0                   | 328.5                        | 440              | X-329B av  | 6                     | -4.59                                | -0.37                                | 28.6                   |
| 157.5                        | 1474             | X-158B av  | 6                     | -5.09                                | -0.88                                | 27.8                   | 331.5                        | 417              | X-332B     | 8                     | -5.45                                | -0.14                                | 28.9                   |
| 161.5                        | 1456             | X-162B     | 4                     | -5.42                                | -2.22                                | 25.7                   | 333.5                        | 402              | X-334B     | 2                     | -5.87                                | -0.67                                | 28.1                   |
| 163.5                        | 1447             | X-164B av  | 6                     | -4.80                                | -1.15                                | 27.3                   | 336.5                        | 379              | X-337B     | 8                     | -4.99                                | -0.15                                | 28.9                   |
| 171.5                        | 1409             | X-172B     | 5                     | -5.71                                | -0.86                                | 27.8                   | 338.5                        | 363              | X-339B av  | 6                     | -5.40                                | -0.44                                | 28.5                   |
| 174.5                        | 1395             | X-175B     | 5                     | -5.40                                | -1.18                                | 27.3                   | 341.5                        | 340              | X-342B     | 8                     | -5.01                                | -0.36                                | 28.6                   |
| 176.5                        | 1385             | X-177B     | 6                     | -5.31                                | -1.18                                | 27.3                   | 343.5                        | 324              | X-344B     | 1                     | -5.00                                | 0.42                                 | 29.8                   |
| 178.5                        | 1375             | X-179B av  | 4                     | -5.06                                | -0.59                                | 28.2                   | 345.5                        | 309              | X-346B av  | 7                     | -5.54                                | -0.20                                | 28.8                   |
| 183.5                        | 1350             | X-184B av  | 6                     | -5.48                                | -1.30                                | 27.1                   |                              |                  |            |                       |                                      |                                      |                        |



**Table DR4.** *Bicornucythere bisanensis* shell  $\delta^{13}\text{C}$  and  $\delta^{18}\text{O}$  values from the bottom-surface sediments in Lake Nakaumi. Both the bottom-water salinity and temperature at the time of sample collection are also listed.

| Sample no. | Sampling month and year | No. of individuals | $\delta^{13}\text{C}$ of <i>Bicornucythere bisanensis</i> VPDB (‰) | $\delta^{18}\text{O}$ of <i>Bicornucythere bisanensis</i> VPDB (‰) | Bottom water salinity | Bottom water temperature (°C) |
|------------|-------------------------|--------------------|--------------------------------------------------------------------|--------------------------------------------------------------------|-----------------------|-------------------------------|
| OI-8       | May 2004                | 12                 | -4.09                                                              | -0.05                                                              | 30.07                 | 18.23                         |
| OI-31      | May 2004                | 3                  | -5.10                                                              | -0.12                                                              | 30.07                 | 18.33                         |
| OI-32      | May 2004                | 4                  | -5.11                                                              | -0.28                                                              | 30.07                 | 18.23                         |
| OI-6       | June 2004               | 3                  | -4.78                                                              | -0.14                                                              | 29.84                 | 20.85                         |
| OI-7       | June 2004               | 2                  | -4.13                                                              | 0.60                                                               | 29.84                 | 20.85                         |
| OI-33      | June 2004               | 4                  | -4.81                                                              | 0.62                                                               | 29.84                 | 20.85                         |
| OI-36      | August 2004             | 4                  | -5.44                                                              | -0.84                                                              | 30.32                 | 26.80                         |
| OI-37      | August 2004             | 3                  | -4.91                                                              | 0.31                                                               | 30.17                 | 26.63                         |
| OI-38      | September 2004          | 3                  | -4.22                                                              | 0.24                                                               | 26.38                 | 25.49                         |
| OI-39      | September 2004          | 4                  | -4.93                                                              | 0.01                                                               | 24.90                 | 25.66                         |
| OI-40      | October 2004            | 4                  | -4.38                                                              | -0.44                                                              | 23.58                 | 24.19                         |
| OI-41      | October 2004            | 2                  | -5.34                                                              | 0.30                                                               | 24.93                 | 23.32                         |
| OI-42      | October 2004            | 3                  | -4.51                                                              | -0.57                                                              | 21.34                 | 23.48                         |
| OI-43      | November 2004           | 4                  | -5.13                                                              | 0.45                                                               | 29.44                 | 20.15                         |
| OI-44      | November 2004           | 4                  | -4.44                                                              | -0.10                                                              | 29.89                 | 20.36                         |
| OI-45      | November 2004           | 2                  | -4.57                                                              | -0.39                                                              | 29.31                 | 20.27                         |
| OI-46      | December 2004           | 4                  | -4.69                                                              | -1.63                                                              | 28.92                 | 16.70                         |
| OI-47      | December 2004           | 2                  | -4.28                                                              | 1.12                                                               | 29.87                 | 17.20                         |
| OI-48      | December 2004           | 2                  | -4.54                                                              | -0.50                                                              | 26.50                 | 16.22                         |
| OI-49      | January 2005            | 3                  | -4.22                                                              | 0.52                                                               | 28.64                 | 11.36                         |
| OI-50      | January 2005            | 2                  | -4.41                                                              | -0.10                                                              | 30.27                 | 12.81                         |
| OI-51      | January 2005            | 2                  | -4.01                                                              | 1.00                                                               | 28.11                 | 12.01                         |
| OI-52      | February 2005           | 3                  | -4.97                                                              | 0.10                                                               | 31.79                 | 11.03                         |
| OI-53      | March 2005              | 2                  | -4.91                                                              | -0.49                                                              | 30.94                 | 11.07                         |
| OI-54      | March 2005              | 2                  | -5.11                                                              | 0.73                                                               | 31.87                 | 11.16                         |
| OI-55      | April 2005              | 3                  | -5.27                                                              | -0.08                                                              | 30.56                 | 12.95                         |
| OI-56      | April 2005              | 3                  | -5.14                                                              | 0.77                                                               | 31.23                 | 12.26                         |
| OI-57      | May 2005                | 3                  | -4.69                                                              | 0.24                                                               | 31.84                 | 16.52                         |
| OI-58      | May 2005                | 3                  | -4.88                                                              | 0.67                                                               | 31.91                 | 16.47                         |
| OI-59      | June 2005               | 3                  | -4.69                                                              | 0.95                                                               | 31.81                 | 19.86                         |
| OI-60      | June 2005               | 3                  | -5.62                                                              | 0.77                                                               | 31.99                 | 19.24                         |
| OI-61      | June 2005               | 2                  | -4.69                                                              | -0.17                                                              | 31.51                 | 19.80                         |

#### Discussions on a long-term trend in $\delta^{18}\text{O}_{\text{ostracode}}$ values

Overall, a long-term decrease in  $\delta^{18}\text{O}_{\text{ostracode}}$  values (from 0 to  $-1.5\text{‰}$ , equivalent to a salinity decrease from ca. 30 to 27) was observed for 300–1200 A.D. (Fig. 2). Subsequently, the  $\delta^{18}\text{O}_{\text{ostracode}}$  values stabilized (with a corresponding salinity of 27–28) between 1200 and 1900 A.D. A period with an environmental shift from an inner bay to brackish lake was previously identified for the ostracode assemblage (Yamada et al., 2015), and the Lake Nakaumi shift coincides with the interval where salinity stabilized at 1200 A.D. This consistency suggests that the long-term  $\delta^{18}\text{O}_{\text{ostracode}}$

decreases occurred because of the salinity decreases associated with regional factors, such as sand bar expansion at the Lake Nakaumi entrance.

## References

- Abe, K., 1983, Population structure of *Keijella bisanensis* (Okubo) Ostracoda, Crustacea) – an inquiry into how far the population structure will be preserved in the fossil record: Journal of the Faculty of Science, the University of Tokyo, Section II, v. 20, p. 443–488.
- Kong, G.S., and Lee, C.W., 2005, Marine reservoir corrections ( $\Delta R$ ) for southern coastal waters of Korea: The Sea, Journal of the Korean Society of Oceanography, v. 10, p. 124–128.
- Kuzmin, Y.V., Burr, G.S., and Jull, A.J.T., 2001, Radiocarbon reservoir correction ages in the Peter the Great Gulf, Sea of Japan, and eastern coast of the Kunashir, Southern Kuriles (Northwestern Pacific): Radiocarbon, v. 43, p. 477–481.
- Yamada, K., Masuma, T., and Seto, K., 2015, Paleoenvironmental changes in Lake Nakaumi during the last 1,700 years on the basis of ostracode assemblages: The Quaternary Research, v. 54, p. 53–68. (In Japanese with English Abstract)
- Yoneda, M., Kitagawa, H., Plicht, J., Uchida, M., Tanaka, A., Uehiro, T., Shibata, Y., Morita, M. and Ohno, T., 2000, Pre-bomb marine reservoir ages in the western north Pacific: Preliminary result on Kyoto University collection: Nuclear Instruments and Methods in Physics Research B, v. 172, p. 377–381.
